# Supplementary material for: Can We Foster a Culture of Peer Support and Promote Mental Health in Adolescence Using a Web-Based App? A Control Group Study
Source: PubMed Central journal article supplement (PMC5074648; doi:10.2196/mental.5597), 2016-09-23
Supplement: mental_v3i3e45_app1.pdf [file mental_v3i3e45_app1.pdf]

**Appendix 1.**

**Table A.** Mixed models for the prediction of change in chronic stress levels from pre- to postevaluation: Model A, B, and C (gender reference category—female, year—year of apprenticeship, year of apprenticeship reference category—first year).

| Predictor             | Model A      |          |          | Model B      |          |          | Model C      |          |          |
|-----------------------|--------------|----------|----------|--------------|----------|----------|--------------|----------|----------|
|                       | Co-efficient | SE       | <i>P</i> | Co-efficient | SE       | <i>P</i> | Co-efficient | SE       | <i>P</i> |
| (Intercept)           | 1.39         | 0.04     | <0.001   | 1.38         | 0.05     | <0.001   | 1.38         | 0.05     | <0.001   |
| Group (Model B)       | -            | -        | -        | 0.04         | 0.06     | 0.54     | 0.04         | 0.06     | 0.54     |
| Group* (Model C)      | -            | -        | -        | -            | -        | -        | -0.15        | 0.03     | <0.001   |
| Time (Model C)        | -0.15        | 0.03     | <0.001   | -0.15        | 0.03     | <0.001   | -0.04        | 0.07     | 0.56     |
| Gender                | -0.23        | 0.06     | <0.001   | -0.23        | 0.06     | <0.001   | -0.23        | 0.06     | <0.001   |
| Year                  | -0.14        | 0.06     | 0.01     | -0.14        | 0.06     | 0.01     | -0.14        | 0.06     | 0.01     |
| Age                   | 0.01         | 0.02     | 0.62     | 0.01         | 0.02     | 0.59     | 0.01         | 0.02     | 0.59     |
| <b>Random effects</b> |              |          |          |              |          |          |              |          |          |
|                       |              | $\sigma$ |          |              | $\sigma$ |          |              | $\sigma$ |          |
| Residual              |              | 0.20     |          | Residual     |          | 0.21     | Residual     |          | 0.21     |
| Intercept             |              | 0.21     |          | Intercept    |          | 0.21     | Intercept    |          | 0.21     |
