# Supplementary material for: Can We Foster a Culture of Peer Support and Promote Mental Health in Adolescence Using a Web-Based App? A Control Group Study
Source: PubMed Central journal article supplement (PMC5074648; doi:10.2196/mental.5597), 2016-09-23
Supplement: mental_v3i3e45_app2.pdf [file mental_v3i3e45_app2.pdf]

## Appendix 2.

**Table B.** Mixed models for the prediction of change in perception of social support from pre- to postevaluation: Model D, E, and F (gender reference category—female, year—year of apprenticeship, year of apprenticeship reference category—first year).

| Predictor             | Model D               |          |        | Model E               |          |        | Model F               |          |        |
|-----------------------|-----------------------|----------|--------|-----------------------|----------|--------|-----------------------|----------|--------|
|                       | Co-efficient          | SE       | P      | Co-efficient          | SE       | P      | Co-efficient          | SE       | P      |
| (Intercept)           | 2.65                  | 0.06     | <0.001 | 2.68                  | 0.06     | <0.001 | 2.7                   | 0.06     | <0.001 |
| Group (Model E)       | -                     | -        | -      | -0.08                 | 0.07     | 0.28   | -0.15                 | 0.09     | 0.08   |
| Group* (Model F)      | -                     | -        | -      | -                     | -        | -      | 0.02                  | 0.05     | 0.78   |
| Time (Model F)        |                       |          |        |                       |          |        |                       |          |        |
| Time                  | 0.06                  | 0.04     | 0.148  | 0.06                  | 0.04     | 0.15   | 0.15                  | 0.09     | 0.12   |
| Gender                | 0.13                  | 0.07     | 0.08   | 0.12                  | 0.07     | 0.09   | 0.12                  | 0.07     | 0.1    |
| Year                  | 0.11                  | 0.07     | 0.12   | 0.12                  | 0.07     | 0.11   | 0.12                  | 0.07     | 0.106  |
| Age                   | -0.08                 | 0.02     | 0.001  | -0.08                 | 0.02     | 0.001  | -0.08                 | 0.02     | 0.001  |
| <b>Random effects</b> |                       |          |        |                       |          |        |                       |          |        |
|                       | <b>Random effects</b> |          |        | <b>Random effects</b> |          |        | <b>Random effects</b> |          |        |
|                       |                       | $\sigma$ |        |                       | $\sigma$ |        |                       | $\sigma$ |        |
|                       | Residual              | 0.4      |        | Residual              | 0.4      |        | Residual              | 0.4      |        |
|                       | Intercept             | 0.3      |        | Intercept             | 0.3      |        | Intercept             | 0.3      |        |
